# Supplementary material for: Effect of Metal Additives in the Bed on the Performance Parameters of an Adsorption Chiller with Desalination Function
Source: MDPI journal article supplement (doi:10.3390/en14217226), 2021-11-02
Supplement: s1 [file s1]

# Effect of Metal Additives in the Bed on the Performance Parameters of an Adsorption Chiller with Desalination Function

Karol Sztekler \*, Wojciech Kalawa, Łukasz Mika and Marcin Sowa

Faculty of Energy and Fuels, AGH University of Science and Technology, Mickiewicza 30, 30-059 Krakow, Poland; sztekler@agh.edu.pl (K.S.); lmika@agh.edu.pl (L.M.); kalawa@agh.edu.pl (W.K.); masowa@agh.edu.pl (M.S.)

\* Correspondence: sztekler@agh.edu.pl

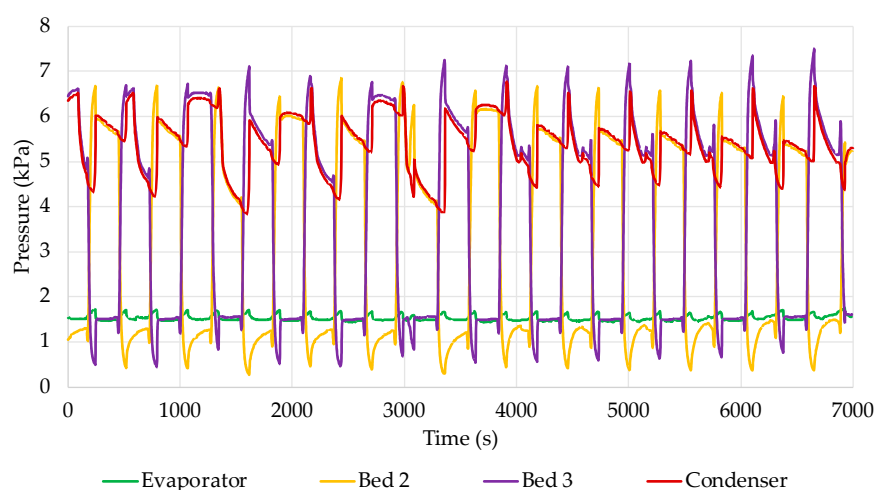

**Figure S1.** Pressure in the beds, evaporator and condenser for time cycle of 200 seconds.

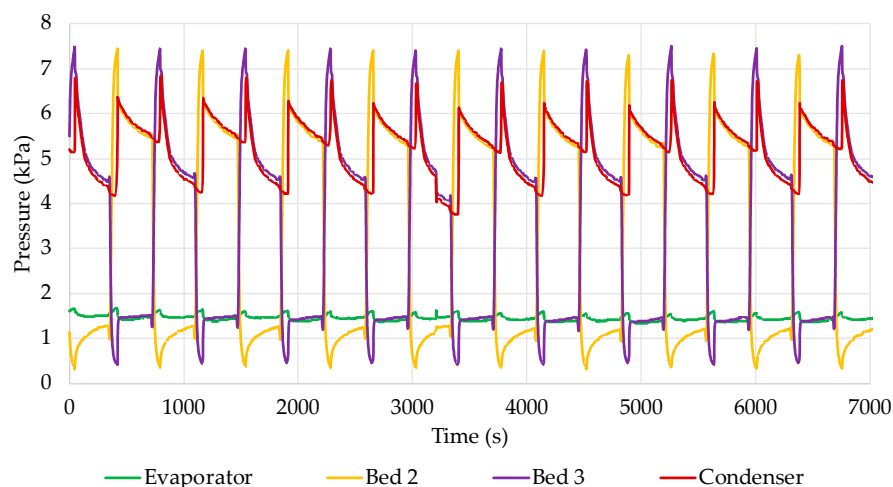

**Figure S2.** Pressure in the beds, evaporator and condenser for time cycle of 300 seconds.
